# Supplementary material for: Post-Stroke Mortality, Stroke Severity, and Preadmission Antipsychotic Medicine Use – A Population-Based Cohort Study
Source: PubMed Central journal article supplement (PMC3885530; doi:10.1371/journal.pone.0084103), 2014-01-08
Supplement: pone.0084103.s001.pdf [file pone.0084103.s001.pdf]

## ONLINE SUPPORTING INFORMATION

### **Post-stroke mortality, stroke severity, and preadmission antipsychotic medicine use – a population-based cohort study**

Anders Prior<sup>1,2</sup>; Thomas Munk Laursen<sup>3</sup>; Karen Kjær Larsen<sup>1,2</sup>; Søren Paaske Johnsen<sup>4</sup>; Jakob Christensen<sup>5</sup>; Grethe Andersen<sup>5</sup>; Mogens Vestergaard<sup>1,2</sup>

<sup>1</sup>Research Unit for General Practice, Department of Public Health, Aarhus University, Denmark;

<sup>2</sup>Section for General Practice, Department of Public Health, Aarhus University, Denmark;

<sup>3</sup>National Centre for Register-based Research, Aarhus University, Denmark;

<sup>4</sup>Department of Clinical Epidemiology, Aarhus University Hospital, Denmark;

<sup>5</sup>Department of Neurology, Aarhus University Hospital, Denmark

**Supporting Table S1. Association between preadmission antipsychotic medication use and length of hospital stay in a competing risk set-up**

| Antipsychotics use | Probability of non-discharge within 30 days (%)* |
|--------------------|--------------------------------------------------|
| Overall            |                                                  |
| Current users      | 27.0                                             |
| Former users       | 24.4                                             |
| Never users        | 21.9                                             |
| Female             |                                                  |
| Current users      | 28.1                                             |
| Former users       | 25.8                                             |
| Never users        | 24.2                                             |
| Male               |                                                  |
| Current users      | 25.4                                             |
| Former users       | 22.5                                             |
| Never users        | 20.0                                             |

\* Unadjusted analysis.

**Supporting Table S2. Association between preadmission antipsychotic medication use and 30-day mortality in acute stroke stratified by age**

| Antipsychotics use | Mortality Rate Ratios* (95% CI) |
|--------------------|---------------------------------|
| < 70 years         |                                 |
| Current users      | 1.42 (1.29-1.58)                |
| Former users       | 1.07 (0.99-1.16)                |
| Never users        | 1.00 (reference)                |
| ≥ 70 years         |                                 |
| Current users      | 1.44 (1.17-1.77)                |
| Former users       | 0.96 (0.80-1.15)                |
| Never users        | 1.00 (reference)                |

\* Adjusted for gender, former stroke, pre-stroke drug use (lipid-lowering drugs, antihypertensive drugs, antidiabetic drugs, platelet inhibitors), education level, age within age group, year of admission, and modified Charlson's index (cerebrovascular disorders excluded).

**Supporting Table S3. Association between preadmission antipsychotic medication use and 30-day mortality in acute stroke stratified by type of stroke and stroke severity on the Scandinavian Stroke Scale**

|                    | Type of stroke                         |                                   |                                  | Severity                        |                               |
|--------------------|----------------------------------------|-----------------------------------|----------------------------------|---------------------------------|-------------------------------|
|                    | Mortality rate ratios* (95% CI)        |                                   |                                  | Mortality rate ratios* (95% CI) |                               |
| Antipsychotics use | Intracerebral hemorrhage (ICD-10: I61) | Cerebral infarction (ICD-10: I63) | Unspecified stroke (ICD-10: I64) | Mild and moderate stroke        | Severe and very severe stroke |
| <b>Overall</b>     |                                        |                                   |                                  |                                 |                               |
| Current users      | 1.28 (1.08-1.51)                       | 1.51 (1.33-1.72)                  | 1.43 (1.16-1.77)                 | 1.34 (1.06-1.69)                | 1.38 (1.23-1.55)              |
| Former users       | 1.01 (0.88-1.15)                       | 1.12 (1.01-1.24)                  | 0.97 (0.81-1.16)                 | 0.89 (0.74-1.08)                | 1.07 (0.97-1.17)              |
| Never users        | 1.00 (reference)                       | 1.00 (reference)                  | 1.00 (reference)                 | 1.00 (reference)                | 1.00 (reference)              |
| <b>Female</b>      |                                        |                                   |                                  |                                 |                               |
| Current users      | 1.19 (0.97-1.46)                       | 1.52 (1.29-1.78)                  | 1.43 (1.08-1.89)                 | 1.11 (0.81-1.53)                | 1.36 (1.18-1.57)              |
| Former users       | 1.03 (0.88-1.22)                       | 1.08 (0.95-1.23)                  | 1.05 (0.85-1.31)                 | 0.83 (0.64-1.08)                | 1.09 (0.97-1.22)              |
| Never users        | 1.00 (reference)                       | 1.00 (reference)                  | 1.00 (reference)                 | 1.00 (reference)                | 1.00 (reference)              |
| <b>Male</b>        |                                        |                                   |                                  |                                 |                               |
| Current users      | 1.56 (1.18-2.07)                       | 1.48 (1.19-1.83)                  | 1.44 (1.04-1.98)                 | 1.62 (1.16-2.27)                | 1.47 (1.21-1.77)              |
| Former users       | 0.97 (0.78-1.20)                       | 1.19 (1.00-1.41)                  | 0.82 (0.59-1.13)                 | 0.95 (0.72-1.25)                | 1.02 (0.87-1.20)              |
| Never users        | 1.00 (reference)                       | 1.00 (reference)                  | 1.00 (reference)                 | 1.00 (reference)                | 1.00 (reference)              |

\* Adjusted for former stroke, pre-stroke drug use (lipid-lowering drugs, antihypertensive drugs, antidiabetic drugs, platelet inhibitors), education level, age group, year of admission, and modified Charlson's index (cerebrovascular disorders excluded). Overall estimates adjusted for gender.

**Supporting Table S4. Association between preadmission antipsychotic medication use and 30-day mortality stratified by former stroke**

| Former stroke                   | Mortality rate ratios*(95% CI) |
|---------------------------------|--------------------------------|
| Yes                             |                                |
| Current users of antipsychotics | 1.44 (1.21-1.71)               |
| Former users of antipsychotics  | 1.09 (0.94-1.26)               |
| Never users of antipsychotics   | 1.00 (reference)               |
| No                              |                                |
| Current users of antipsychotics | 1.54 (1.36-1.74)               |
| Former users of antipsychotics  | 1.04 (0.94-1.14)               |
| Never users of antipsychotics   | 1.00 (reference)               |
| Unknown                         |                                |
| Current users of antipsychotics | 1.10 (0.88-1.38)               |
| Former users of antipsychotics  | 1.06 (0.87-1.28)               |
| Never users of antipsychotics   | 1.00 (reference)               |

\* Adjusted for gender, pre-stroke drug use (lipid-lowering drugs, antihypertensive drugs, antidiabetic drugs, platelet inhibitors), education level, age group, year of admission, and modified Charlson's index (cerebrovascular disorders excluded).

**Supporting Table S5. Association between preadmission antipsychotic medication use and 30-day mortality stratified by former neurological disorder**

| Former neurological disorders†  | Mortality rate ratios*(95% CI) |
|---------------------------------|--------------------------------|
| Yes                             |                                |
| Current users of antipsychotics | 1.35 (1.16-1.56)               |
| Former users of antipsychotics  | 1.02 (0.91-1.15)               |
| Never users of antipsychotics   | 1.00 (reference)               |
| No                              |                                |
| Current users of antipsychotics | 1.46 (1.30-1.64)               |
| Former users of antipsychotics  | 1.08 (0.98-1.18)               |
| Never users of antipsychotics   | 1.00 (reference)               |

\* Adjusted for gender, former stroke, pre-stroke drug use (lipid-lowering drugs, antihypertensive drugs, antidiabetic drugs, platelet inhibitors), education level, age group, year of admission, and modified Charlson's index (cerebrovascular disorders excluded).

† Neurological and cerebrovascular disorders included (ICD-10): DG00-DG99, DI60-DI69.

**Supporting Table S6. Association between preadmission antipsychotic medication use and 30-day mortality stratified by a diagnosis of diabetes**

| Diabetes†                       | Mortality rate ratios*(95% CI) |
|---------------------------------|--------------------------------|
| Yes                             |                                |
| Current users of antipsychotics | 1.36 (1.05-1.75)               |
| Former users of antipsychotics  | 1.19 (0.98-1.44)               |
| Never users of antipsychotics   | 1.00 (reference)               |
| No                              |                                |
| Current users of antipsychotics | 1.43 (1.29-1.58)               |
| Former users of antipsychotics  | 1.02 (0.94-1.11)               |
| Never users of antipsychotics   | 1.00 (reference)               |

\* Adjusted for gender, former stroke, pre-stroke drug use (lipid-lowering drugs, antihypertensive drugs, antidiabetic drugs, platelet inhibitors), education level, age group, year of admission, and modified Charlson's index (cerebrovascular disorders and diabetes excluded).

† Diabetes diagnoses (ICD-10): E10.0, E10.1, E10.9, E11.0, E11.1, E11.9

**Supporting Table S7. Association between preadmission antipsychotic medication use and 30-day mortality stratified by preadmission anti-dementia medication use**

| Anti-dementia medication use <sup>†</sup> | Mortality rate ratios*(95% CI) |
|-------------------------------------------|--------------------------------|
| Yes                                       |                                |
| Current users of antipsychotics           | 1.75 (1.24-2.46)               |
| Former users of antipsychotics            | 1.46 (1.06-2.01)               |
| Never users of antipsychotics             | 1.00 (reference)               |
| No                                        |                                |
| Current users of antipsychotics           | 1.41 (1.28-1.55)               |
| Former users of antipsychotics            | 1.04 (0.97-1.13)               |
| Never users of antipsychotics             | 1.00 (reference)               |

\* Adjusted for gender, former stroke, pre-stroke drug use (lipid-lowering drugs, antihypertensive drugs, antidiabetic drugs, platelet inhibitors), education level, age group, year of admission, and modified Charlson's index (cerebrovascular disorders excluded).

† Prescription on anti-dementia medication (ATC-groups: N06DA, N06DX) redeemed within 12 months before the admission with stroke.



**Supporting Table S8. Association between preadmission antipsychotic medication use and 30-day mortality in acute stroke according to typical versus atypical antipsychotics use**

| Antipsychotics use | Mortality rate ratios* (95% CI) |                  |                           |
|--------------------|---------------------------------|------------------|---------------------------|
|                    | Typical                         | Atypical         | Both typical and atypical |
| Current users†     | 1.44 (1.25-1.66)                | 1.93 (1.65-2.26) | 1.58 (1.03-2.42)          |
| Former users†      | 1.06 (0.98-1.15)                | 1.52 (1.23-1.89) | 1.55 (1.21-1.99)          |
| Never users        | 1.00 (reference)                | 1.00 (reference) | 1.00 (reference)          |

\* Adjusted for gender, former stroke, pre-stroke drug use (lipid-lowering drugs, antihypertensive drugs, antidiabetic drugs, platelet inhibitors), education level, age group, year of admission, and modified Charlson's index (cerebrovascular disorders excluded).

† Current atypical and former typical use: MRR (95% CI) = 1.67 (1.37-2.04)

Current typical and former atypical use: MRR (95% CI) = 1.63 (0.98-2.71)

**Supporting Table S9. Association between preadmission antipsychotic medication use and 30-day mortality in users having filled three or more prescriptions before admission for acute stroke**

| Antipsychotics use | Mortality rate ratios*(95% CI) |
|--------------------|--------------------------------|
| Current users      | 1.37 (1.24-1.51)               |
| Former users       | 1.07 (0.97-1.18)               |
| Never users        | 1.00 (reference)               |

\* Adjusted for gender, former stroke, pre-stroke drug use (lipid-lowering drugs, antihypertensive drugs, antidiabetic drugs, platelet inhibitors), education level, age group, year of admission, and modified Charlson's index (cerebrovascular disorders excluded).

**Supporting Table S10. Association between quality of in-hospital care, preadmission antipsychotic medication use and 30-day mortality**

| Quality of in-hospital care† | Mortality rate ratios*(95% CI) |
|------------------------------|--------------------------------|
| Missing                      | 5.98 (5.62-6.37)               |
| 0% - 19%                     | 1.18 (1.08-1.30)               |
| 20% - 39%                    | 1.11 (1.03-1.21)               |
| 40% - 59%                    | 0.92 (0.85-1.00)               |
| 60% - 79%                    | 1.08 (1.01-1.15)               |
| 80% - 100%                   | 1.00 (reference)               |

  

| Antipsychotics use | Mortality rate ratios‡ (95% CI) |
|--------------------|---------------------------------|
| Current users      | 1.31 (1.19-1.43)                |
| Former users       | 1.02 (0.95-1.10)                |
| Never users        | 1.00 (reference)                |

\* Adjusted for gender, former stroke, pre-stroke drug use (lipid-lowering drugs, antihypertensive drugs, antidiabetic drugs, platelet inhibitors), education level, age group, year of admission, and modified Charlson's index (cerebrovascular disorders excluded).

† Percentage of fulfilled indicators of in-hospital care quality in the acute phase of the stroke.

‡ Adjusted for gender, former stroke, pre-stroke drug use (lipid-lowering drugs, antihypertensive drugs, antidiabetic drugs, platelet inhibitors), education level, age group, year of admission, modified Charlson's index (cerebrovascular disorders excluded), and quality of in-hospital care.

**Supporting Table S11. Association between antipsychotic medication use and 30-day mortality in complete-case analyses of alcohol and tobacco use**

| Antipsychotics use              | Mortality rate ratios*(95% CI) |
|---------------------------------|--------------------------------|
| Alcohol use†                    |                                |
| Current users of antipsychotics | 1.44 (1.26-1.64)               |
| Former users of antipsychotics  | 1.03 (0.93-1.13)               |
| Never users of antipsychotics   | 1.00 (reference)               |
| Tobacco use‡                    |                                |
| Current users of antipsychotics | 1.53 (1.33-1.76)               |
| Former users of antipsychotics  | 0.99 (0.89-1.10)               |
| Never users of antipsychotics   | 1.00 (reference)               |

\* Adjusted for gender, former stroke, pre-stroke drug use (lipid-lowering drugs, antihypertensive drugs, antidiabetic drugs, platelet inhibitors), education level, age group, year of admission, and modified Charlson's index (cerebrovascular disorders excluded).

† Adjusted for alcohol use, missings excluded.

‡ Adjusted for tobacco use, missings excluded.

**Supporting Table S12. Association between preadmission antipsychotic medication use and 30-day mortality. Propensity score matching analysis**

| Propensity score                | Mortality rate ratios*(95% CI) |
|---------------------------------|--------------------------------|
| 2†                              |                                |
| Current users of antipsychotics | 2.67 (1.10-6.47)               |
| Former users of antipsychotics  | 1.48 (0.81-2.71)               |
| Never users of antipsychotics   | 1.00 (reference)               |
| 5                               |                                |
| Current users of antipsychotics | 1.72 (1.28-2.31)               |
| Former users of antipsychotics  | 1.31 (1.05-1.64)               |
| Never users of antipsychotics   | 1.00 (reference)               |
| 8                               |                                |
| Current users of antipsychotics | 1.56 (1.27-1.91)               |
| Former users of antipsychotics  | 1.13 (0.96-1.32)               |
| Never users of antipsychotics   | 1.00 (reference)               |
| 11                              |                                |
| Current users of antipsychotics | 1.64 (1.36-1.97)               |
| Former users of antipsychotics  | 1.08 (0.92-1.26)               |
| Never users of antipsychotics   | 1.00 (reference)               |
| 14                              |                                |
| Current users of antipsychotics | 1.51 (1.24-1.84)               |
| Former users of antipsychotics  | 1.09 (0.93-1.27)               |
| Never users of antipsychotics   | 1.00 (reference)               |
| 17                              |                                |
| Current users of antipsychotics | 1.63 (1.28-2.08)               |
| Former users of antipsychotics  | 1.13 (0.93-1.39)               |
| Never users of antipsychotics   | 1.00 (reference)               |
| 20                              |                                |
| Current users of antipsychotics | 1.40 (1.03-1.90)               |
| Former users of antipsychotics  | 1.02 (0.78-1.33)               |
| Never users of antipsychotics   | 1.00 (reference)               |

\* Adjusted for gender, former stroke, pre-stroke drug use (lipid-lowering drugs, antihypertensive drugs, antidiabetic drugs, platelet inhibitors), education level, age group, year of admission, and modified Charlson's index (cerebrovascular disorders excluded).

† Very few cases in this group.
